# Supplementary material
Source: PubMed Central journal article supplement (PMC10168017)
Supplement: NIHMS1879685-supplement-1.pdf [file NIHMS1879685-supplement-1.pdf]

1  
2  
3  
4  
5  
6  
7  
8  
9  
10  
11  
12  
13  
14  
15  
16  
17  
18  
19  
20

**Supplementary Information for**

**Cryo-EM structure of the *Agrobacterium tumefaciens* type IV secretion system-associated T-pilus  
reveals stoichiometric protein-phospholipid assembly**

Stefan Kreida<sup>1#</sup>, Akihiro Narita<sup>2#</sup>, Matthew D Johnson<sup>3</sup>, Elitza I Tocheva<sup>4</sup>, Anath Das<sup>5</sup>, Debnath Ghosal<sup>3,6,\*</sup>, Grant J. Jensen<sup>1,7,\*</sup>

A)

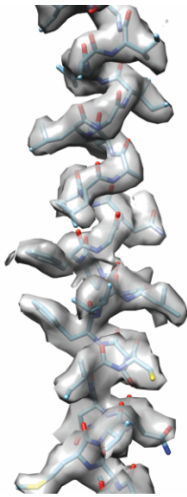

B)

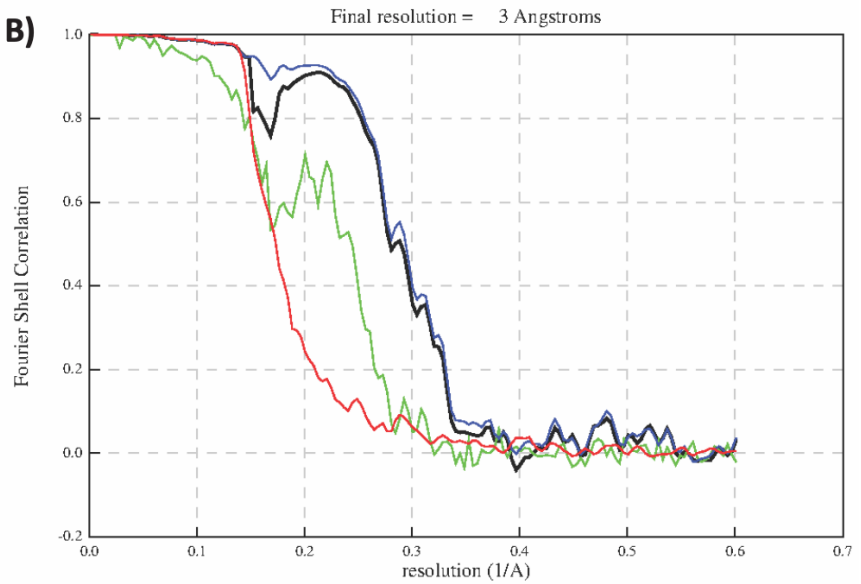

21

22 **Figure S1. Resolution estimation, related to STAR Methods.** (A) Representative region of VirB2

23 monomer showing the fit of the atomic model to the experimentally derived cryo-EM density map.

24 (B) Fourier shell correlations (FSCs) for evaluating the resolution calculated by RELION.<sup>33</sup> FSCs between

25 two 3D structures from each half of the dataset with or without masking are presented in green and

26 blue, respectively. The red curve was calculated after the phase was randomized beyond 6.9 Å to

27 evaluate the artifacts from overfitting. The black curve is the corrected FSC after accounting for the

28 artifacts from overfitting. Based on the gold-standard criteria between two half-maps, the resolution

29 is 3.0 Å with a threshold of 0.143.

30

31

32

33

34

35

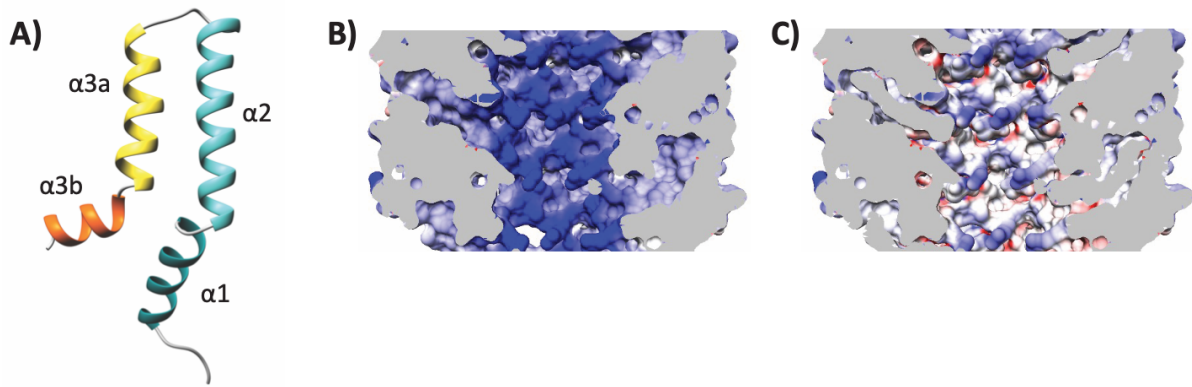

36

37 **Figure S2. VirB2 monomer and luminal electrostatic potential, related to Figure 4.** (A) VirB2

38 monomer showing 4 helices ( $\alpha 1$ ,  $\alpha 2$ ,  $\alpha 3a$  and  $\alpha 3b$ ). (B-C) Electrostatic potential of the T-pilus lumen

39 shown (B) without lipid and (C) with lipid. Electrostatic potential of the lumen was calculated using

40 Chimera.

41

42

43

44

45

46

47

48

49

50

51

52

53

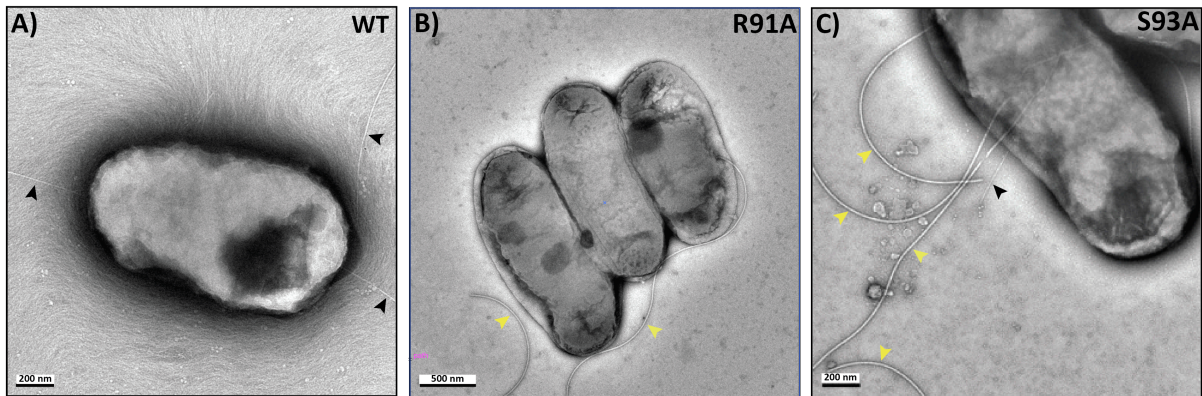

54

55 **Figure S3. Effect of R91 mutation on T-pilus formation, related to Figure 5.** Negatively stained  
56 micrographs of (A) WT, (B) R91A and (C) S93A mutants showing presence of T-pili (WT and S93A) and  
57 absence (R91A) of T-pilus, respectively. Black arrows show T-pili (~10 nm in diameter), yellow arrows  
58 show flagella. Scale bar, as shown on the micrographs. The swirl-like pattern in A is a staining gradient  
59 of the formvar surface spreading from the height of the cell.

60

61

62

63

64

65

66

67

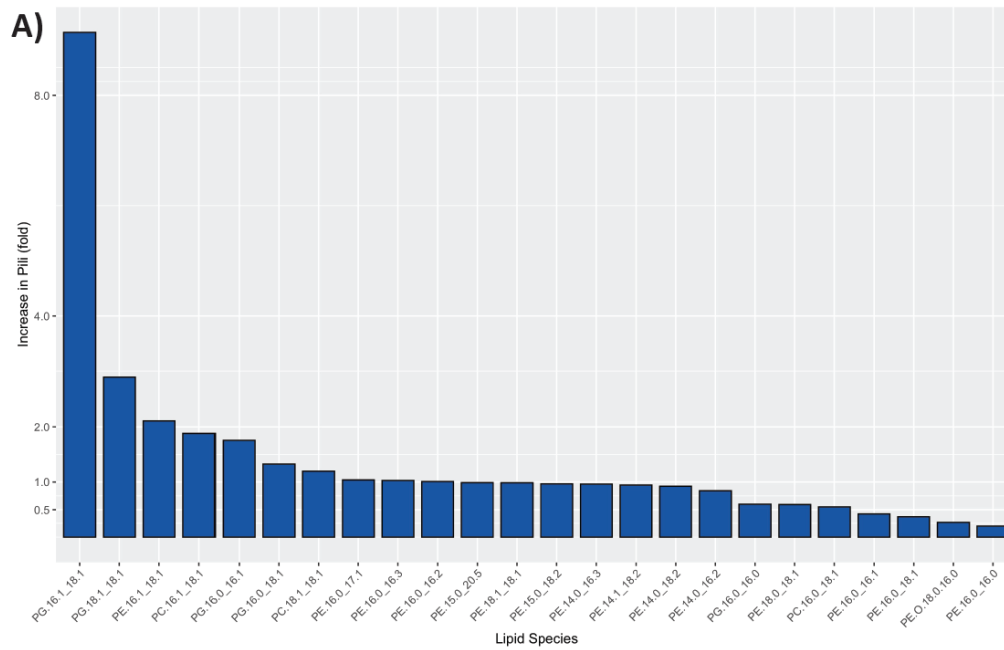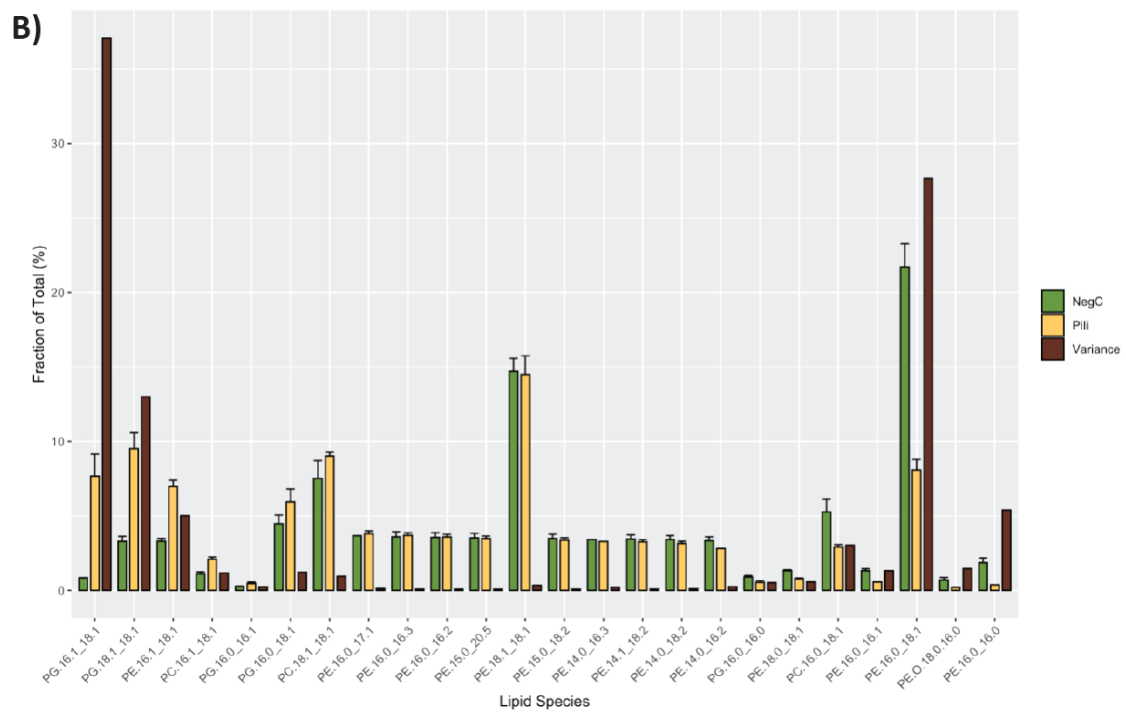

68

69 **Figure S4. Lipidomic analysis of the T-pilus, related to Figure 2.** (A) Barplot showing the fold increase  
 70 of each analyzed lipid species in the pili-containing sample compared to the negative control (B)  
 71 Barplot showing relative abundances of lipid species (in percent) in purified pilus sample (yellow) and  
 72 negative control (green), as an average of three independent experiments. The bars are ordered by  
 73 the fold increase in pili. Error bars show the standard deviation for triplicates. The variance was

74 calculated for each lipid species for all six observations (three from pilus, and three from negative  
75 control) on CLR-transformed data. This value was then divided by the summed variance of all species.  
76 This Contribution to Total Variance (in percent) for each lipid species is shown in brown.

77

78

79

80

81

82

83

84

85

86

87

88

89

90

91

92

93

| <b>Table S1. Cryo-EM data collection, refinement and validation statistics</b> |           |
|--------------------------------------------------------------------------------|-----------|
| <b>Parameter</b>                                                               |           |
| <b>Data collection and processing</b>                                          |           |
| Voltage (kV)                                                                   | 300       |
| Electron exposure (e <sup>-</sup> /Å <sup>2</sup> )                            | 60        |
| Pixel size (Å)                                                                 | 0.832     |
| Final particle images (n)                                                      | 3543      |
| <b>Helical symmetry</b>                                                        |           |
| Point group                                                                    | C5        |
| Helical rise (Å)                                                               | 13.4      |
| Helical twist (°)                                                              | 32.6      |
| <b>Map resolution (Å)</b>                                                      |           |
| Map:map FSC (0.143)                                                            | 3.0       |
| Model:map FSC (0.143)                                                          | 2.5       |
| D <sub>99</sub>                                                                | 2.6       |
| <b>Refinement and model validation</b>                                         |           |
| B-factor (Å <sup>2</sup> )                                                     | -75.4     |
| Bond length RMSD (Å)                                                           | 0.004     |
| Bond angles RMSD (°)                                                           | 0.818     |
| Model:map RSCC                                                                 | 0.8       |
| Clash score                                                                    | 3.2       |
| Poor rotamer (%)                                                               | 0         |
| Ramachandran favoured                                                          | 100       |
| Ramachandran outlier                                                           | 0         |
| Molprobit score                                                                | 1.11      |
| <b>Deposition ID</b>                                                           |           |
| PDB (model)                                                                    | 8FAI      |
| EMDB (map)                                                                     | EMD-28957 |

95

96

97

98 **Table S2. Lipidomic analysis of the T-pilus, related to STAR Methods.** Relative abundances of lipid  
 99 species with SD in pili-containing samples and negative control as an average of three independent  
 100 preparations.

| Lipid Species  | Pili (%)            | NegC (%)            | Increase in Pili (fold) | Contribution to Total Variance (%) |
|----------------|---------------------|---------------------|-------------------------|------------------------------------|
| PG.16.1_18.1   | <b>7.67</b> ± 1.48  | <b>0.84</b> ± 0.01  | <b>9.14</b>             | <b>37.06</b>                       |
| PG.18.1_18.1   | <b>9.52</b> ± 1.06  | <b>3.29</b> ± 0.33  | <b>2.89</b>             | <b>13.00</b>                       |
| PE.16.1_18.1   | <b>6.97</b> ± 0.43  | <b>3.30</b> ± 0.19  | <b>2.11</b>             | <b>5.01</b>                        |
| PC.16.1_18.1   | <b>2.09</b> ± 0.14  | <b>1.11</b> ± 0.13  | <b>1.88</b>             | <b>1.16</b>                        |
| PG.16.0_16.1   | <b>0.46</b> ± 0.09  | <b>0.26</b> ± 0.02  | <b>1.76</b>             | <b>0.24</b>                        |
| PG.16.0_18.1   | <b>5.94</b> ± 0.87  | <b>4.47</b> ± 0.58  | <b>1.33</b>             | <b>1.22</b>                        |
| PC.18.1_18.1   | <b>9.02</b> ± 0.24  | <b>7.52</b> ± 1.19  | <b>1.20</b>             | <b>0.94</b>                        |
| PE.16.0_17.1   | <b>3.80</b> ± 0.19  | <b>3.67</b>         | <b>1.04</b>             | <b>0.12</b>                        |
| PE.16.0_16.3   | <b>3.69</b> ± 0.18  | <b>3.59</b> ± 0.34  | <b>1.03</b>             | <b>0.09</b>                        |
| PE.16.0_16.2   | <b>3.59</b> ± 0.18  | <b>3.56</b> ± 0.32  | <b>1.01</b>             | <b>0.08</b>                        |
| PE.18.1_18.1   | <b>14.49</b> ± 1.26 | <b>14.70</b> ± 0.87 | <b>0.99</b>             | <b>0.34</b>                        |
| PE.15.0_20.5   | <b>3.48</b> ± 0.17  | <b>3.52</b> ± 0.31  | <b>0.99</b>             | <b>0.07</b>                        |
| PE.15.0_18.2   | <b>3.37</b> ± 0.16  | <b>3.49</b> ± 0.29  | <b>0.97</b>             | <b>0.08</b>                        |
| PE.14.0_16.3   | <b>3.28</b>         | <b>3.41</b>         | <b>0.96</b>             | <b>0.19</b>                        |
| PE.14.1_18.2   | <b>3.26</b> ± 0.16  | <b>3.45</b> ± 0.28  | <b>0.94</b>             | <b>0.09</b>                        |
| PE.14.0_18.2   | <b>3.15</b> ± 0.15  | <b>3.41</b> ± 0.27  | <b>0.92</b>             | <b>0.11</b>                        |
| PE.14.0_16.2   | <b>2.81</b>         | <b>3.34</b> ± 0.26  | <b>0.84</b>             | <b>0.25</b>                        |
| PG.16.0_16.0   | <b>0.54</b> ± 0.12  | <b>0.89</b> ± 0.10  | <b>0.60</b>             | <b>0.52</b>                        |
| PE.18.0_18.1   | <b>0.78</b> ± 0.04  | <b>1.32</b> ± 0.06  | <b>0.59</b>             | <b>0.57</b>                        |
| PC.16.0_18.1   | <b>2.90</b> ± 0.17  | <b>5.26</b> ± 0.85  | <b>0.55</b>             | <b>3.03</b>                        |
| PE.16.0_16.1   | <b>0.56</b> ± 0.01  | <b>1.32</b> ± 0.13  | <b>0.42</b>             | <b>1.32</b>                        |
| PE.16.0_18.1   | <b>8.08</b> ± 0.70  | <b>21.71</b> ± 1.56 | <b>0.37</b>             | <b>27.67</b>                       |
| PE.O.18.0.16.0 | <b>0.19</b> ± 0.01  | <b>0.70</b> ± 0.17  | <b>0.27</b>             | <b>1.46</b>                        |
| PE.16.0_16.0   | <b>0.37</b> ± 0.01  | <b>1.86</b> ± 0.31  | <b>0.20</b>             | <b>5.39</b>                        |

101
